# Supplementary material for: Anaerobic Digestion and Removal of Sulfamethoxazole, Enrofloxacin, Ciprofloxacin and Their Antibiotic Resistance Genes in a Full-Scale Biogas Plant
Source: MDPI journal article supplement (doi:10.3390/antibiotics10050502), 2021-04-28
Supplement: s1 [file s1]

**Table S1.** Main MS/MS parameters set for the detection of SMX, ENR and CIP. RT means retention time; ESI mode means positive (+) ionization mode; DP means declustering potential; CE means collision energy.

| Compound | RT<br>(min) | ESI<br>Mode | Precursor ion<br>(m/z) | Product<br>ion (m/z) | DP<br>(V) | CE<br>(eV) |
|----------|-------------|-------------|------------------------|----------------------|-----------|------------|
| SMX      | 6.4         | +           | 254.1                  | 92.0                 | 40        | 39.0       |
|          |             |             |                        | 108.1                |           | 39.4       |
|          |             |             |                        | 156.0                |           | 22.8       |
| ENR      | 13.8        | +           | 360.2                  | 342.1                | 40        | 21.0       |
|          |             |             |                        | 316.1                |           | 35.0       |
| CIP      | 14.5        | +           | 332.2                  | 245.2                | 40        | 33.6       |
|          |             |             |                        | 288.2                |           | 26.5       |

**Table S2.** List of primers used for ARGs quantification

| Primer name       | Target gene           | Primer sequence (5'->3')  | Reference |
|-------------------|-----------------------|---------------------------|-----------|
| Sul1 fw           | <i>sul1</i>           | CGCACCGGAAACATCGCTGCAC    | [67]      |
| Sul1 rv           |                       | TGAAGTTCCGCCGCAAGGCTCG    |           |
| Sul2 fw           | <i>sul2</i>           | GCGCTCAAGGCAGATGGCATT     | [68]      |
| Sul2 rv           |                       | GCGTTTGATACCGGCACCCGT     |           |
| IntI1 fw          | <i>intI1</i>          | TCGTGCGTCGCCATACA         | [69]      |
| IntI1 rv          |                       | GCTTGTTCTACGGCCGTTTGA     |           |
| 16S fw            | 16S rRNA              | CGGTGAATACG TTCYCGG       | [70]      |
| 16S rv            |                       | TACCTTGTTACGACTT          |           |
| qnrS fw           | <i>qnrS</i>           | GACGTGCTAACTTGCGTGAT      | [71]      |
| qnrS rv           |                       | TGGCATTGTTGGAAACTT        |           |
| qepA fw           | <i>qepA</i>           | GCAGGTCCAGCAGCGGGTAG      | [72]      |
| qepA rv           |                       | CTTCCTGCCCCGAGTATCGTG     |           |
| Aac-(6')-Ib cr fw | <i>aac-(6')-Ib-cr</i> | TGCATCACA AACTGGGCAAAGGCT | [73]      |
| Aac-(6')-Ib cr rv |                       | ACACGGCTGGACCATATGGGGT    |           |
